# Supplementary material
Source: PubMed Central journal article supplement (PMC7855731)

# Suppl. Figure 1. Overall Survival

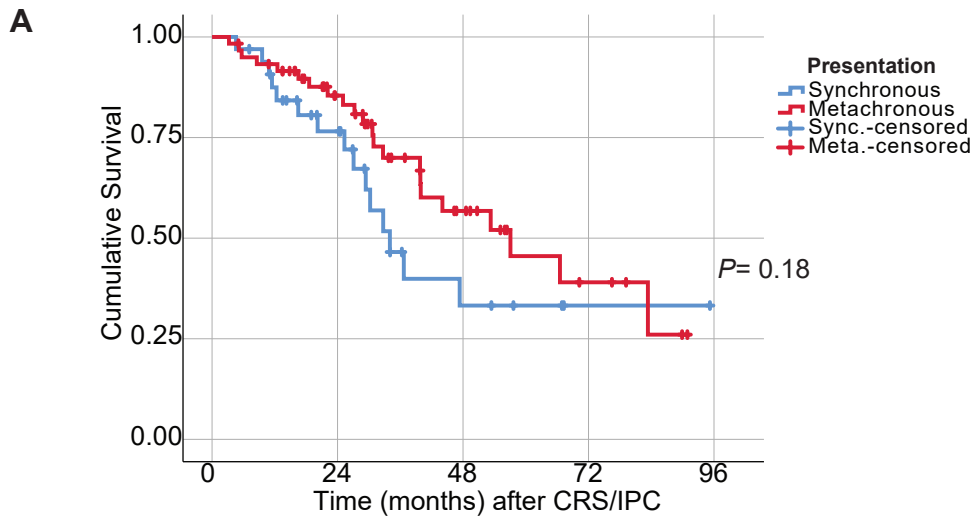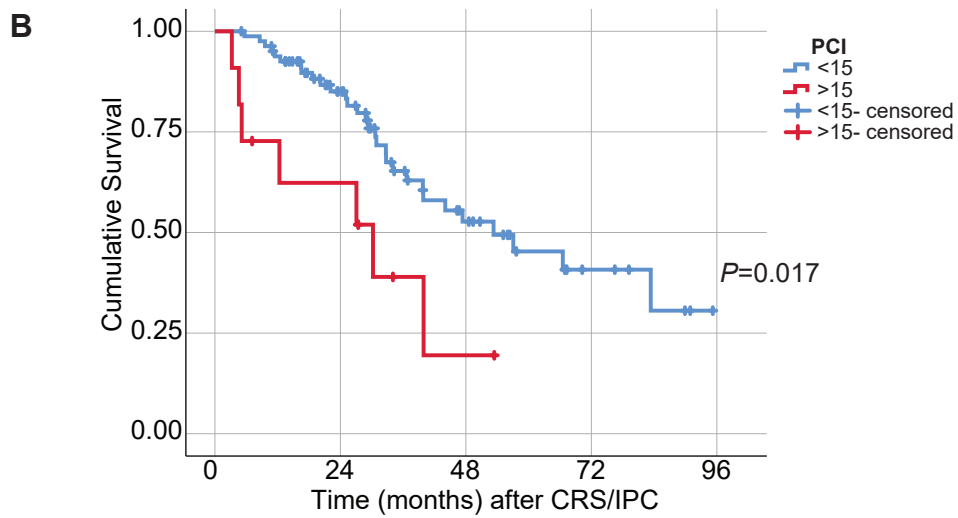

Supplement: NIHMS1636888-supplement-1636888_Supp_Fig1.pdf [file NIHMS1636888-supplement-1636888_Supp_Fig1.pdf]
